# Supplementary material for: Descriptive Epidemiology of Uruguayan Adults’ Leisure Time Physical Activity
Source: MDPI journal article supplement (doi:10.3390/ijerph15071387), 2018-07-02
Supplement: s1 [file s1]

**Supplementary Table 1.** Prevalence of physical inactivity by gender and age groups.

| <b>Age groups</b> | <b>Male</b>      | <b>Female</b>    | <b>Total</b>     |
|-------------------|------------------|------------------|------------------|
| 15–24 years       | 27.2 (21.7–33.5) | 52.4 (46.3–58.5) | 40.8 (36.4–45.3) |
| 25–34 years       | 43.0 (36.9–49.4) | 60.5 (54.5–66.2) | 52.3 (47.9–56.6) |
| 35–44 years       | 45.7 (39.2–52.3) | 51.8 (45.6–57.9) | 48.9 (44.4–53.5) |
| 45–54 years       | 49.8 (43.0–56.5) | 47.8 (42.0–53.5) | 48.6 (44.2–53.0) |
| 55–64 years       | 55.5 (49.3–61.5) | 53.9 (48.5–59.2) | 54.6 (50.5–58.6) |
| 65+ years         | 46.9 (41.8–52.0) | 58.9 (55.0–62.6) | 54.5 (51.4–57.6) |
| Total             | 45.1 (42.6–47.6) | 55.0 (52.8–57.2) | 50.8 (49.2–52.4) |

**Supplementary Table 2.** Prevalence of recommended physical activity by regions.

| <b>Region</b>  | <b>Total</b>     | <b>Male</b>      | <b>Female</b>    |
|----------------|------------------|------------------|------------------|
| Montevideo     | 25.9 (23.5–28.5) | 31.7 (27.7–36.0) | 21.8 (18.8–25.1) |
| Artigas        | 30.3 (21.7–40.7) | 35.3 (21.1–52.7) | 27.3 (17.1–40.6) |
| Canelones      | 23.7 (20.5–27.3) | 30.1 (24.6–36.3) | 19.5 (15.7–24.0) |
| Cerro Largo    | 28.2 (22.1–35.2) | 28.2 (19.3–39.2) | 28.2 (20.3–37.6) |
| Colonia        | 30.1 (24.0–36.9) | 38.0 (28.7–48.4) | 22.8 (15.6–32.0) |
| Florida        | 22.9 (17.9–28.8) | 32.0 (23.4–41.9) | 16.2 (10.8–23.5) |
| Lavalleja      | 26.6 (18.0–37.4) | 28.6 (16.0–45.7) | 25.0 (14.3–40.0) |
| Maldonado      | 30.4 (24.3–37.3) | 40.9 (31.1–51.5) | 21.7 (14.8–30.6) |
| Paysandú       | 27.8 (17.4–41.2) | 33.3 (18.1–53.1) | 22.2 (10.2–41.9) |
| Rivera         | 15.7 (11.8–20.8) | 13.9 (8.5–21.8)  | 17.1 (11.8–24.1) |
| San José       | 16.0 (12.4–20.4) | 24.1 (17.5–32.1) | 10.2 (6.6–15.5)  |
| Soriano        | 24.2 (17.4–32.5) | 27.6 (17.6–40.5) | 21.2 (12.9–32.8) |
| Treinta y Tres | 24.3 (15.8–35.4) | 31.4 (18.2–48.6) | 17.9 (8.7–33.4)  |

**Supplementary Table 3.** Prevalence of conformance with proxy PA international recommendations by region, SES, and educational level.

| Variables                                 | Age groups       |                  |                  |                  |                  |                  |
|-------------------------------------------|------------------|------------------|------------------|------------------|------------------|------------------|
|                                           | 15–24 years      | 25–34 years      | 35–44 years      | 45–54 years      | 55–64 years      | 65+ years        |
| <b>SES</b>                                |                  |                  |                  |                  |                  |                  |
| Q1                                        | 17.2 (8.0–33.2)  | 17.1 (7.22–35.2) | 19.8 (10.8–33.6) | 27.5 (16.2–42.6) | 12.9 (7.6–21.0)  | 14.4 (10.2–19.9) |
| Q2                                        | 20.8 (12.4–32.7) | 20.6 (11.7–33.7) | 21.1 (10.8–37.1) | 25.5 (14.9–40.1) | 14.7 (6.4–30.1)  | 16.7 (12.1–22.7) |
| Q3                                        | 19.3 (12.5–28.7) | 21.3 (13.3–32.3) | 25.4 (16.7–36.6) | 17.1 (9.6–28.8)  | 23.3 (14.8–34.7) | 22.3 (14.9–31.9) |
| Q4                                        | 50.6 (39.6–61.6) | 32.2 (24.2–41.4) | 27.3 (18.1–39.0) | 28.7 (19.9–39.5) | 22.0 (13.9–33.0) | 22.2 (13.7–33.8) |
| Q5                                        | 35.6 (25.7–46.9) | 29.2 (20.2–40.0) | 23.6 (16.7–32.2) | 34.6 (25.9–44.4) | 27.7 (19.4–37.8) | 32.6 (23.1–43.7) |
| <b>Educational level</b>                  |                  |                  |                  |                  |                  |                  |
| Incomplete primary<br>to complete primary | 26.7 (19.7–35.2) | 13.0 (7.6–21.5)  | 19.4 (12.9–28.1) | 21.7 (15.7–29.3) | 16.5 (11.5–23.0) | 20.1 (16.2–24.6) |
| Complete secondary                        | 33.8 (26.4–42.2) | 32.3 (24.1–41.7) | 25.4 (18.5–33.9) | 32.4 (23.7–42.7) | 27.9 (20.0–37.4) | 21.5 (15.0–29.8) |
| Complete tertiary                         | 34.8 (24.7–46.4) | 34.9 (27.3–43.4) | 27.4 (19.6–36.8) | 34.5 (25.2–45.2) | 23.1 (15.2–33.6) | 22.2 (14.1–33.0) |

SES: socioeconomic status.
